# Supplementary material for: Evaluation of Version 4 of the Emergency Severity Index in US Emergency Departments for the Rate of Mistriage
Source: PubMed Central journal article supplement (PMC10024207; doi:10.1001/jamanetworkopen.2023.3404), 2023-03-17
Supplement: jamanetwopen-e233404-s001.pdf [file jamanetwopen-e233404-s001.pdf]

## Supplementary Online Content

Sax DR, Warton EM, Mark DG, et al; Kaiser Permanente CREST (Clinical Research on Emergency Services & Treatments) Network. Evaluation of the Emergency Severity Index in US emergency departments for the rate of mistriage. *JAMA Netw Open*. 2023;6(3):e233404. doi:10.1001/jamanetworkopen.2023.3404

**eFigure.** Study Cohort Assembly

**eTable 1.** Intervention Levels

**eTable 2.** Rates of Resource Utilization Among All Included Encounters and by Version 4 of the Emergency Severity Index (ESI) Assignment

**eTable 3.** Rates of Level 1-4 Interventions Among Full Study Cohort and by Version 4 of the Emergency Severity Index (ESI) Assignment

This supplementary material has been provided by the authors to give readers additional information about their work.

**eFigure.** Study Cohort Assembly

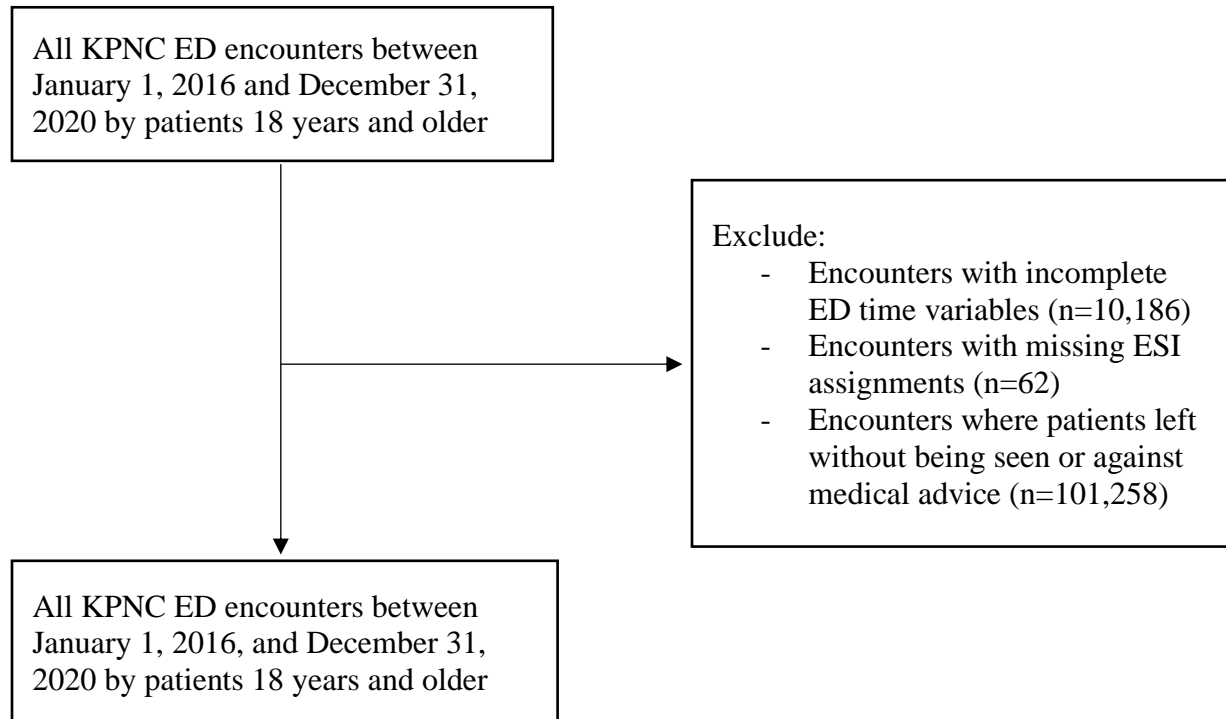

Abbreviations: ED, emergency department; KPNC, Kaiser Permanente Northern California

**eTable 1.** Intervention Levels

| Intervention level | Description                                                                                                                                                                                                                                                                                                                                                                                                                                                                                                                                                                                                                                                                                                                                                                                                                                                                                                                                                           |
|--------------------|-----------------------------------------------------------------------------------------------------------------------------------------------------------------------------------------------------------------------------------------------------------------------------------------------------------------------------------------------------------------------------------------------------------------------------------------------------------------------------------------------------------------------------------------------------------------------------------------------------------------------------------------------------------------------------------------------------------------------------------------------------------------------------------------------------------------------------------------------------------------------------------------------------------------------------------------------------------------------|
| 1                  | <p>Lifesaving intervention within 1 h of arrival in ED:</p> <ul style="list-style-type: none"> <li>• Invasive ventilation</li> <li>• Tier I critical medications used: epinephrine, norepinephrine, vasopressin, dopamine, dobutamine, phenylephrine, isoproterenol, atropine, tenecteplase, alteplase</li> <li>• Admission to catheterization suite, operating room, or ICU or transfer to another hospital</li> <li>• Blood transfusion: fresh frozen plasma, platelets, prothrombin complex concentrate, or <math>\geq 1</math> unit packed red blood cells</li> <li>• Death in the ED</li> </ul>                                                                                                                                                                                                                                                                                                                                                                  |
| 2                  | <p>Any of these specific level 1 interventions beyond first hour:</p> <ul style="list-style-type: none"> <li>• Invasive ventilation, tier 1 critical medication, admission to catheterization suite, massive transfusion protocol, <math>&gt;2</math> units blood, or death in the ED</li> <li>• Any tier II critical medication used (at any time): nicardipine, sodium nitroprusside, esmolol, milrinone, labetalol drip, nitroglycerin drip, dextrose 50%, naloxone, calcium gluconate or calcium chloride, sodium bicarbonate</li> <li>• Parenteral psychotropic medication administered within 120 min: haloperidol lactate (<math>\geq 5</math> mg if patient aged <math>&lt;65</math> y, <math>\geq 2</math> mg if aged <math>\geq 65</math> y), lorazepam (<math>\geq 2</math> mg), olanzapine (<math>\geq 10</math> mg), or ziprasidone mesylate (<math>\geq 10</math> mg)</li> <li>• Noninvasive ventilation</li> <li>• Intraosseous line placed</li> </ul> |
| 3                  | <ul style="list-style-type: none"> <li>• Admission to ICU or operating room or transfer to another hospital beyond first hour</li> <li>• Critical procedures: central line, arterial line, paracentesis, thoracentesis, tube thoracostomy, and lumbar puncture</li> <li>• Tier III critical medication used (at any time): parenteral procainamide,</li> </ul>                                                                                                                                                                                                                                                                                                                                                                                                                                                                                                                                                                                                        |

|   |                                                                                                                                                                                                                                                                                                                                                                                                     |
|---|-----------------------------------------------------------------------------------------------------------------------------------------------------------------------------------------------------------------------------------------------------------------------------------------------------------------------------------------------------------------------------------------------------|
|   | amiodarone, ibutilide, heparin, insulin drip, continuous albuterol <ul style="list-style-type: none"> <li>• No level 1 or 2 intervention</li> </ul>                                                                                                                                                                                                                                                 |
| 4 | <ul style="list-style-type: none"> <li>• Tier IV medications used (at any time): parenteral etomidate, ketamine, propofol, metoprolol, diltiazem, adenosine, digoxin, hydralazine, labetalol, or sublingual or transdermal nitroglycerin</li> <li>• 1-2 units packed red blood cell or any other blood product transfusion beyond first hour</li> <li>• No level 1, 2, or 3 intervention</li> </ul> |

Abbreviations: ED, emergency department; ICU, intensive care unit; mg, milligrams; y, years

**eTable 2.** Rates of Resource Utilization Among All Included Encounters and by Version 4 of the Emergency Severity Index (ESI) Assignment

| Number of types of resources used | All patients<br>n=5,315,176<br>(%) | ESI I<br>n=33,491<br>(%) | ESI II<br>n=929,555<br>(%) | ESI III<br>n=3,262,047<br>(%) | ESI IV<br>n=1,046,806<br>(%) | ESI V<br>n=43,277<br>(%) |
|-----------------------------------|------------------------------------|--------------------------|----------------------------|-------------------------------|------------------------------|--------------------------|
| 0                                 | 949,401<br>(17.9)                  | 127<br>(0.38)            | 22,769<br>(2.45)           | 351,189<br>(10.8)             | 538,960<br>(51.5)            | 36,356<br>(84.0)         |
| 1                                 | 1,027,855<br>(19.3)                | 1551<br>(4.6)            | 53,662<br>(5.8)            | 558,713<br>(17.1)             | 407,864<br>(39.0)            | 6,065<br>(14.0)          |
| 2+                                | 3,337,920<br>(62.8)                | 31,813<br>(95.0)         | 853,124<br>(91.8)          | 2,352,145<br>(72)             | 99,982<br>(9.6)              | 856<br>(2.0)             |

Notes: Resource use was defined as it is in version 4 of the Emergency Severity Index, and each different type of resource is counted as a resource, not the individual tests or imaging studies. We only included resources that were measured electronically. Resource types include laboratory analysis, electrocardiograms, radiology exams (X-ray, CT scan, MRI, and ultrasound), intravenous fluids, and intravenous or intramuscular medications. ESI I cases should represent emergent, life-threatening conditions, whereas ESI V cases should represent low acuity, low resource-need patients. Percentages in each cell are column percentages.

**eTable 3.** Rates of Level 1-4 Interventions Among Full Study Cohort and by Version 4 of the Emergency Severity Index (ESI) Assignment

| Intervention Level         | All patients<br>n=5,315,176<br>(%) | ESI I<br>n=33,491<br>(%) | ESI II<br>n=929,555<br>(%) | ESI III<br>n=3,262,047<br>(%) | ESI IV<br>n=1,046,806<br>(%) | ESI V<br>n=43,277<br>(%) |
|----------------------------|------------------------------------|--------------------------|----------------------------|-------------------------------|------------------------------|--------------------------|
| Level 1<br>(most severe)   | 28,383 (0.5)                       | 11,091<br>(33.1)         | 13,278<br>(1.43)           | 3,809<br>(0.1)                | 196<br>(0.02)                | 9<br>(0.02)              |
| Level 2                    | 136,207<br>(2.6)                   | 10,329<br>(30.8)         | 73,715<br>(7.9)            | 51,792<br>(1.6)               | 359<br>(0.03)                | 12<br>(0.03)             |
| Level 3                    | 189,553<br>(3.6)                   | 2,794<br>(8.3)           | 71,862<br>(7.7)            | 113,893<br>(3.5)              | 1,004<br>(0.1)               | 0<br>(0.0)               |
| Level 4<br>(least severe)  | 161,193<br>(3.0)                   | 1,403<br>(4.2)           | 77,606<br>(8.4)            | 81,569<br>(2.5)               | 613<br>(0.06)                | 2<br>(0.0)               |
| Hospital admission         | 673,659<br>(12.7)                  | 21,069<br>(62.9)         | 283,048<br>(30.5)          | 367,431<br>(11.3)             | 2,085<br>(0.2)               | 26<br>(0.06)             |
| No Level 1-4 interventions | 4,799,840<br>(90.3)                | 7,824<br>(23.5)          | 693,094<br>(74.6)          | 3,010,984<br>(92.3)           | 1,044,634<br>(99.8)          | 43,254<br>(100)          |

Notes: Please see Table 1 above for Level 1-4 intervention definitions. ESI I cases should represent emergent, life-threatening conditions, whereas ESI V cases should represent low acuity, low resource-need patients. Percentages in each cell are column percentages.
