# Supplementary material for: Evaluation of Version 4 of the Emergency Severity Index in US Emergency Departments for the Rate of Mistriage
Source: PubMed Central journal article supplement (PMC10024207; doi:10.1001/jamanetworkopen.2023.3404), 2023-03-17
Supplement: jamanetwopen-e233404-s002.pdf [file jamanetwopen-e233404-s002.pdf]

\*First name, last name, and suffix (if applicable) are required and will appear in PubMed.

| <b>*Group Name(s): Kaiser Permanente CREST (Clinical Research on Emergency Services &amp; Treatments) Network</b> |                   |                              |                  |                                                            |                                          |                                                         |                                                                                            |
|-------------------------------------------------------------------------------------------------------------------|-------------------|------------------------------|------------------|------------------------------------------------------------|------------------------------------------|---------------------------------------------------------|--------------------------------------------------------------------------------------------|
| <b>*First Name and Middle Initial(s)</b>                                                                          | <b>*Last Name</b> | <b>*Suffix (eg, Jr, III)</b> | Academic Degrees | Institution                                                | Location (city, state/province, country) | Role or Contribution, eg, chair, principal investigator | Group (if more than 1 Group listed in the byline) and/or Subgroup (eg, Steering Committee) |
| Adina S                                                                                                           | Rauchwerger       |                              | MPH              | Kaiser Permanente Northern California Division of Research | Oakland, CA                              | Project Manager                                         |                                                                                            |
| Jennifer Y                                                                                                        | Zhang             |                              | BS               | Kaiser Permanente Northern California Division of Research | Oakland, CA                              | Research Assistant                                      |                                                                                            |
