# Supplementary material for: Evaluation of Version 4 of the Emergency Severity Index in US Emergency Departments for the Rate of Mistriage
Source: PubMed Central journal article supplement (PMC10024207; doi:10.1001/jamanetworkopen.2023.3404), 2023-03-17
Supplement: jamanetwopen-e233404-s003.pdf [file jamanetwopen-e233404-s003.pdf]

## Data Sharing Statement

Sax. Evaluation of Version 4 of the Emergency Severity Index in US Emergency Departments for the Rate of Mistrriage. *JAMA Netw Open*. Published March 17, 2023.

doi:10.1001/jamanetworkopen.2023.3404

### Data

**Data available:** No

### Additional Information

**Explanation for why data not available:** We will share aggregate data and define all predictor variables and outcomes, but we are not able to share individual patient data.
